# Supplementary material for: Comparison of the integrin α4β7 expression pattern of memory T cell subsets in HIV infection and ulcerative colitis
Source: PLOS journal article supplement (doi:10.1371/journal.pone.0220008), 2019-07-29
Supplement: S2 (10.1371/journal.pone.0220008.s002) [file journal.pone.0220008.s002]

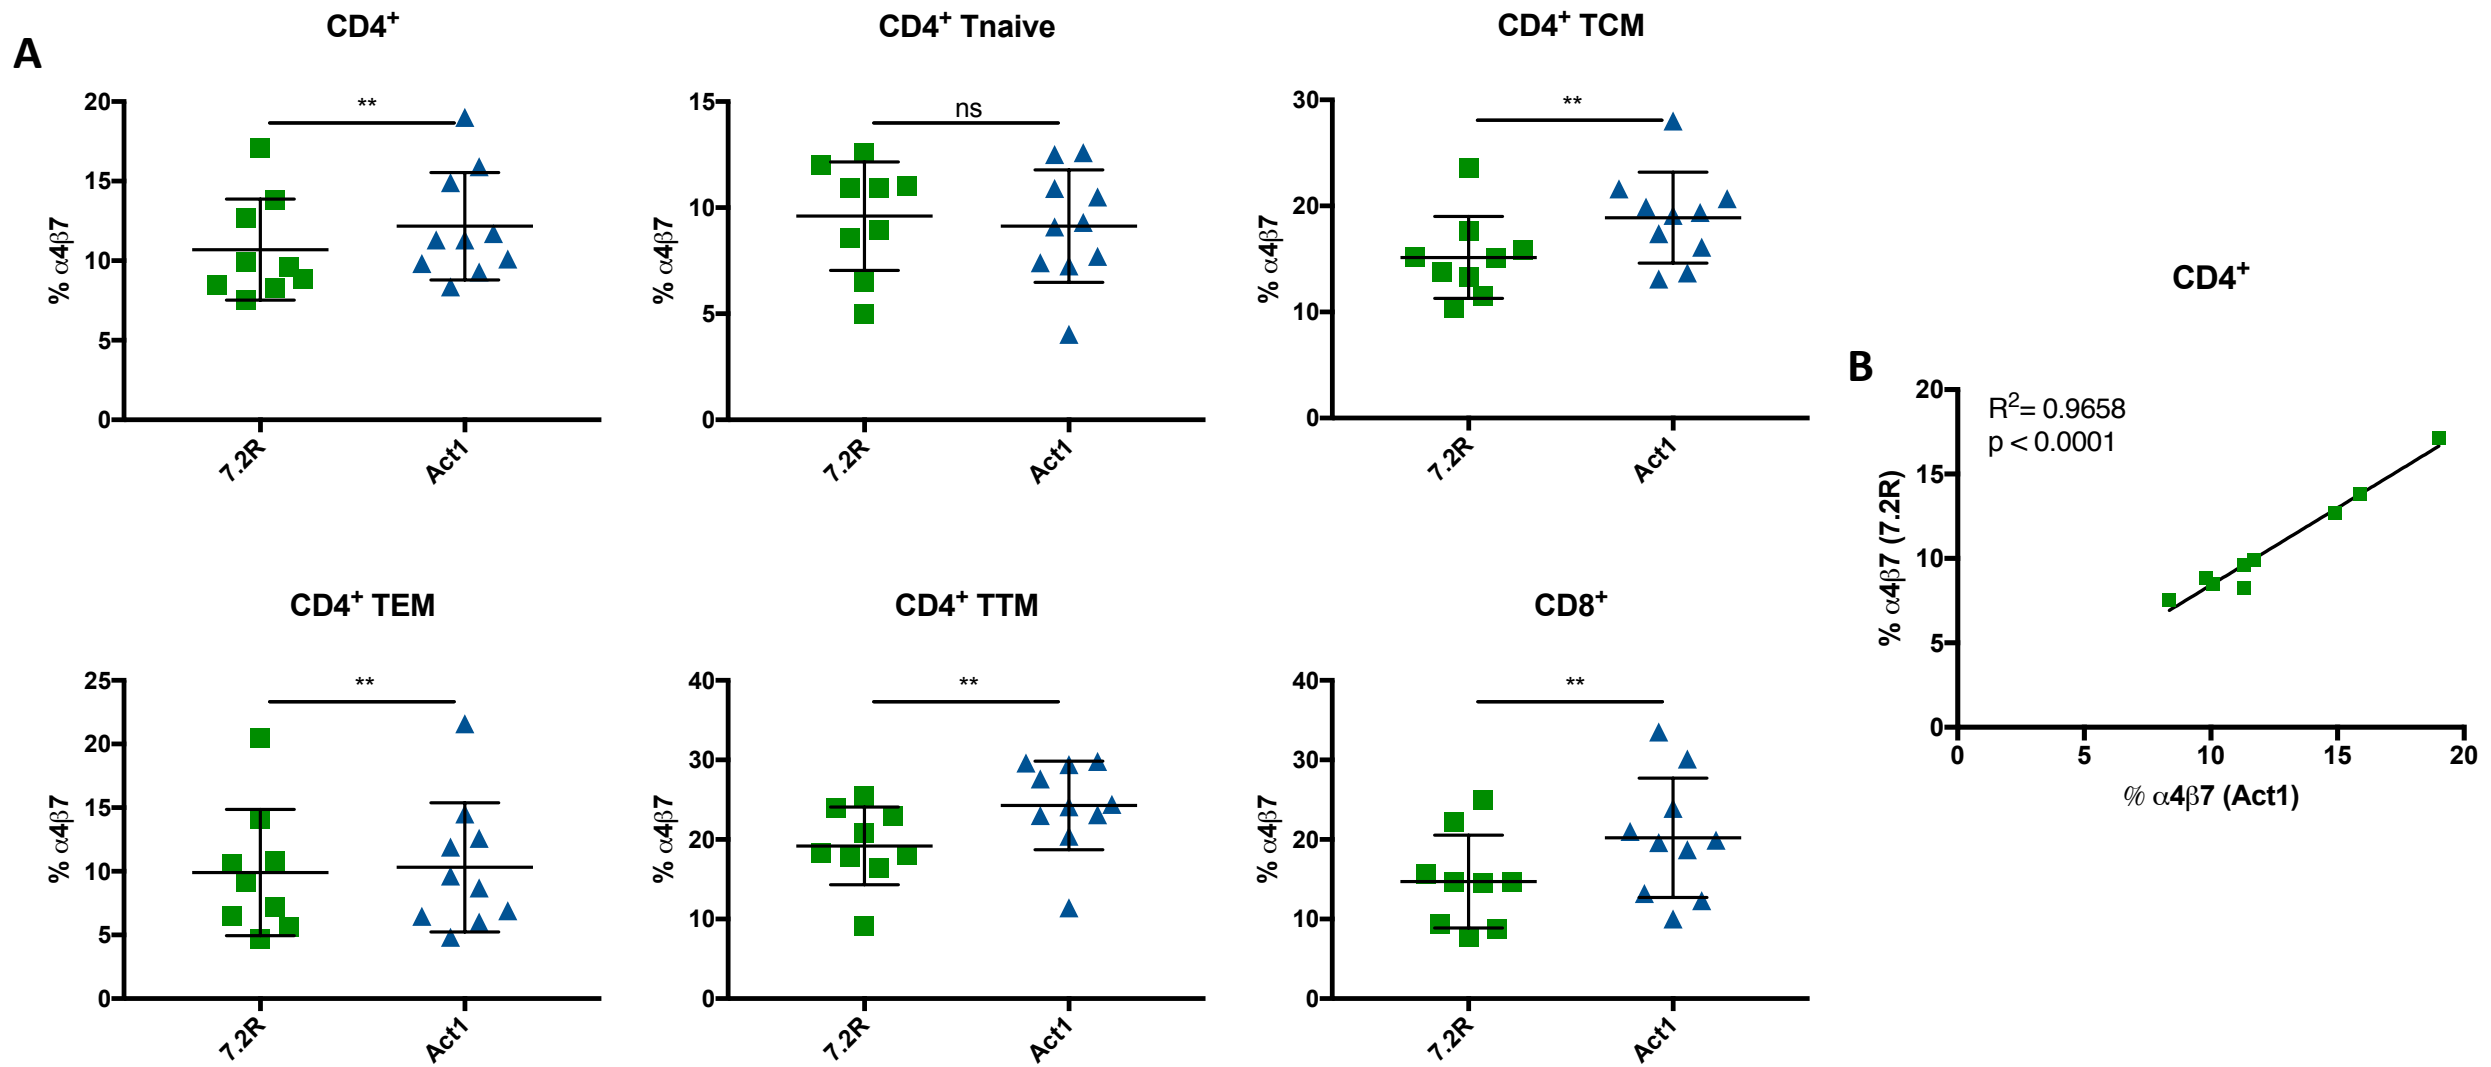

**Supplemental Figure S1: Comparison of the  $\alpha 4\beta 7$ -specific clone Act1 and the  $\alpha 4$ -specific clone 7.2R in combination with a separate  $\beta 7$ -specific antibody.**

**A** PBMC of healthy controls were stained with either an  $\alpha 4$ -specific antibody (clone 7.2R) in combination with a  $\beta 7$ -specific antibody (clone FIB504) (left, green) or with the  $\alpha 4\beta 7$ -specific antibody, clone Act1 (right, blue). Results were analysed using the Wilcoxon matched-pairs signed rank test, nonparametric test of paired samples. **B** Analysed frequencies of both staining approaches are highly correlated.
