# Supplementary material for: Comparison of the integrin α4β7 expression pattern of memory T cell subsets in HIV infection and ulcerative colitis
Source: PLOS journal article supplement (doi:10.1371/journal.pone.0220008), 2019-07-29
Supplement: S3 (10.1371/journal.pone.0220008.s003) [file journal.pone.0220008.s003]

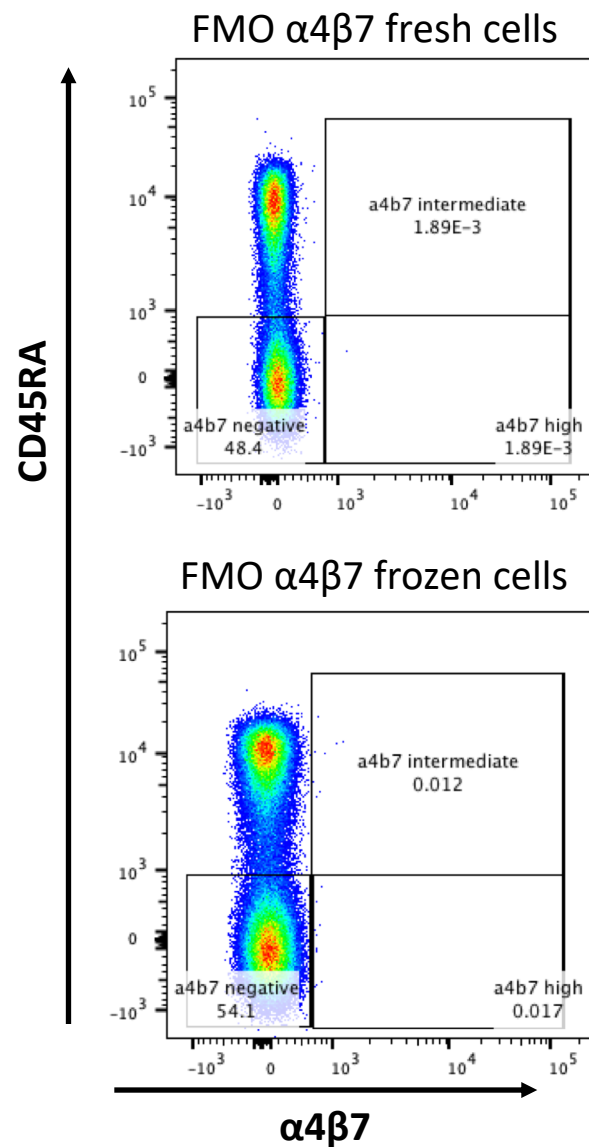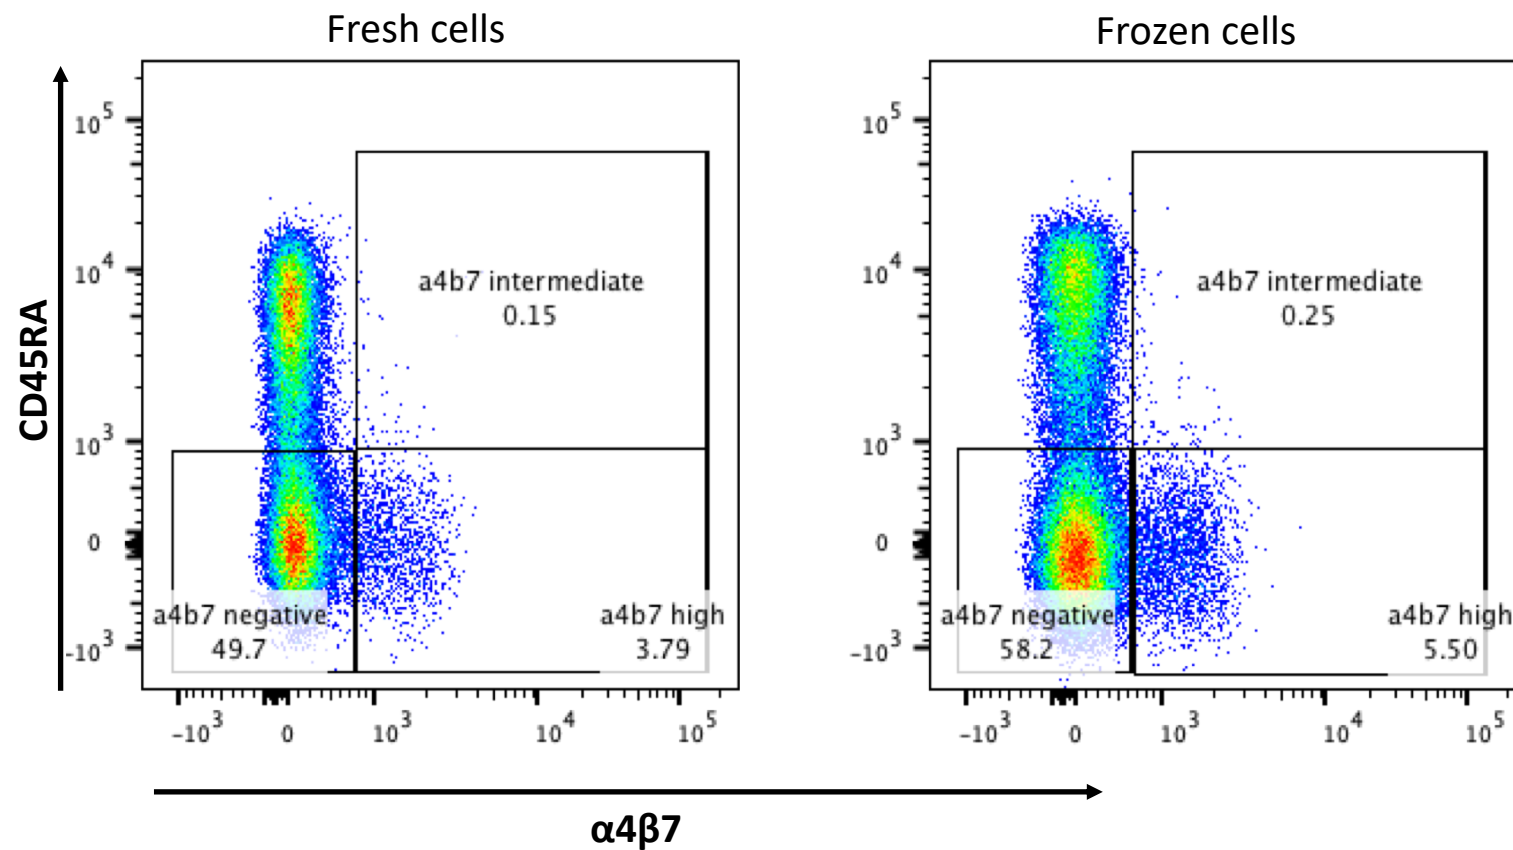

**Supplemental Figure S2: Comparison of fresh and frozen cells stained with the  $\alpha 4\beta 7$ -specific antibody (clone Act1).**

PBMC were collected from healthy donors and stained freshly. An aliquot of cells was frozen down at  $-80^{\circ}\text{C}$  overnight and stained the following day. Gating according to fluorescence minus one (FMO) controls.
