# Supplementary material for: Comparison of the integrin α4β7 expression pattern of memory T cell subsets in HIV infection and ulcerative colitis
Source: PLOS journal article supplement (doi:10.1371/journal.pone.0220008), 2019-07-29
Supplement: S4 (10.1371/journal.pone.0220008.s004) [file journal.pone.0220008.s004]

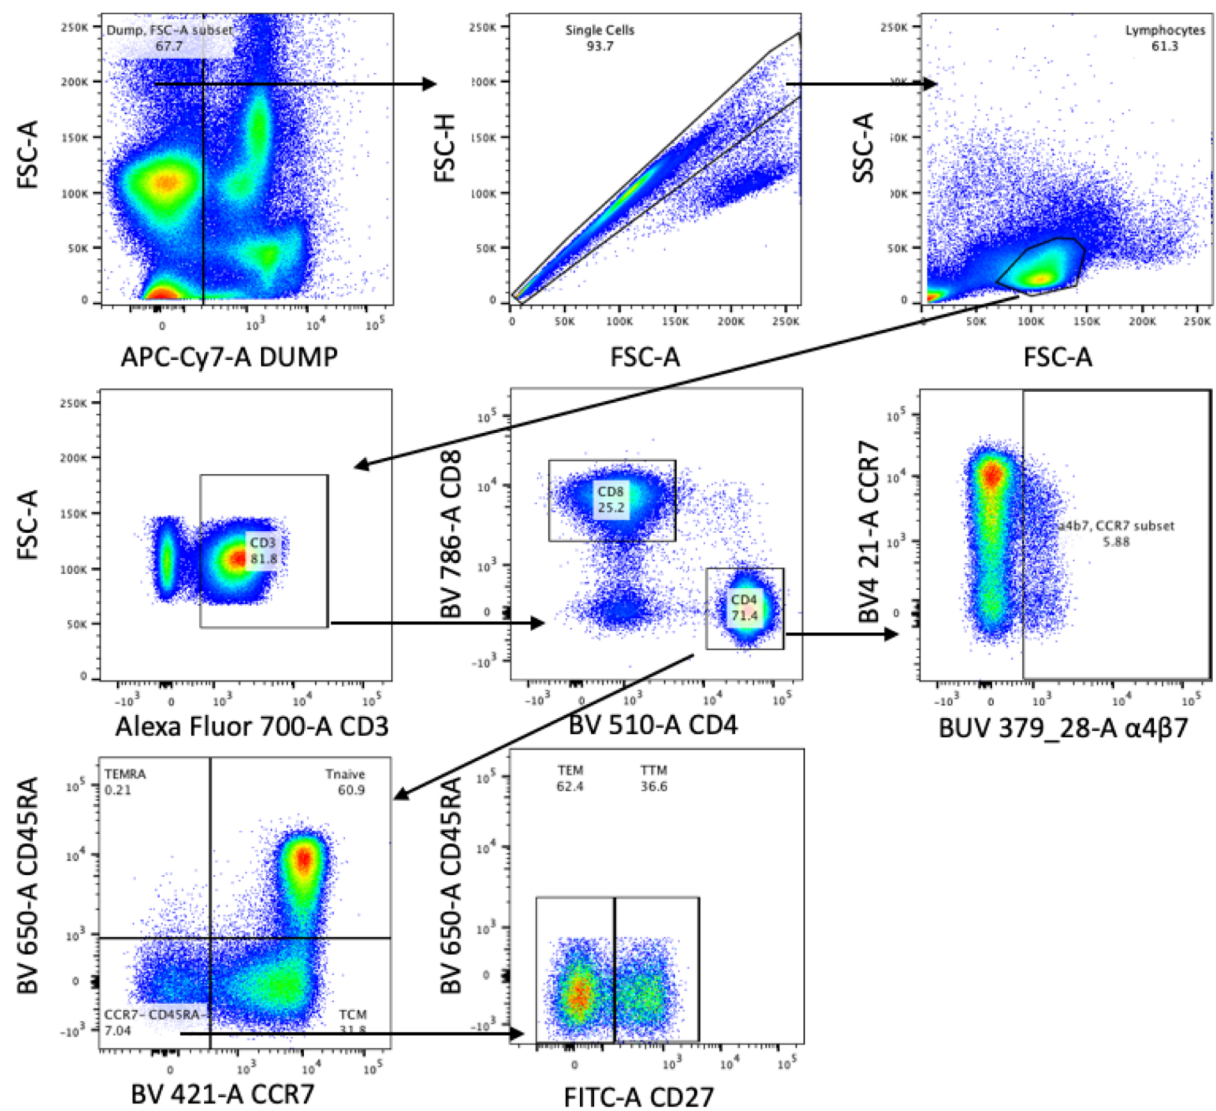

**Supplemental Figure S3: Gating strategy for CD4<sup>+</sup> α4β7<sup>+</sup> T cells stained with an the α4β7-specific (clone Act1) antibody.**  
 Live cells, single cells, lymphocytes, CD3<sup>+</sup>, CD4<sup>+</sup> T cells, α4β7<sup>+</sup> CD4<sup>+</sup> T cells.
