# Supplementary material for: Comparison of the integrin α4β7 expression pattern of memory T cell subsets in HIV infection and ulcerative colitis
Source: PLOS journal article supplement (doi:10.1371/journal.pone.0220008), 2019-07-29
Supplement: S6 (10.1371/journal.pone.0220008.s006) [file journal.pone.0220008.s006]

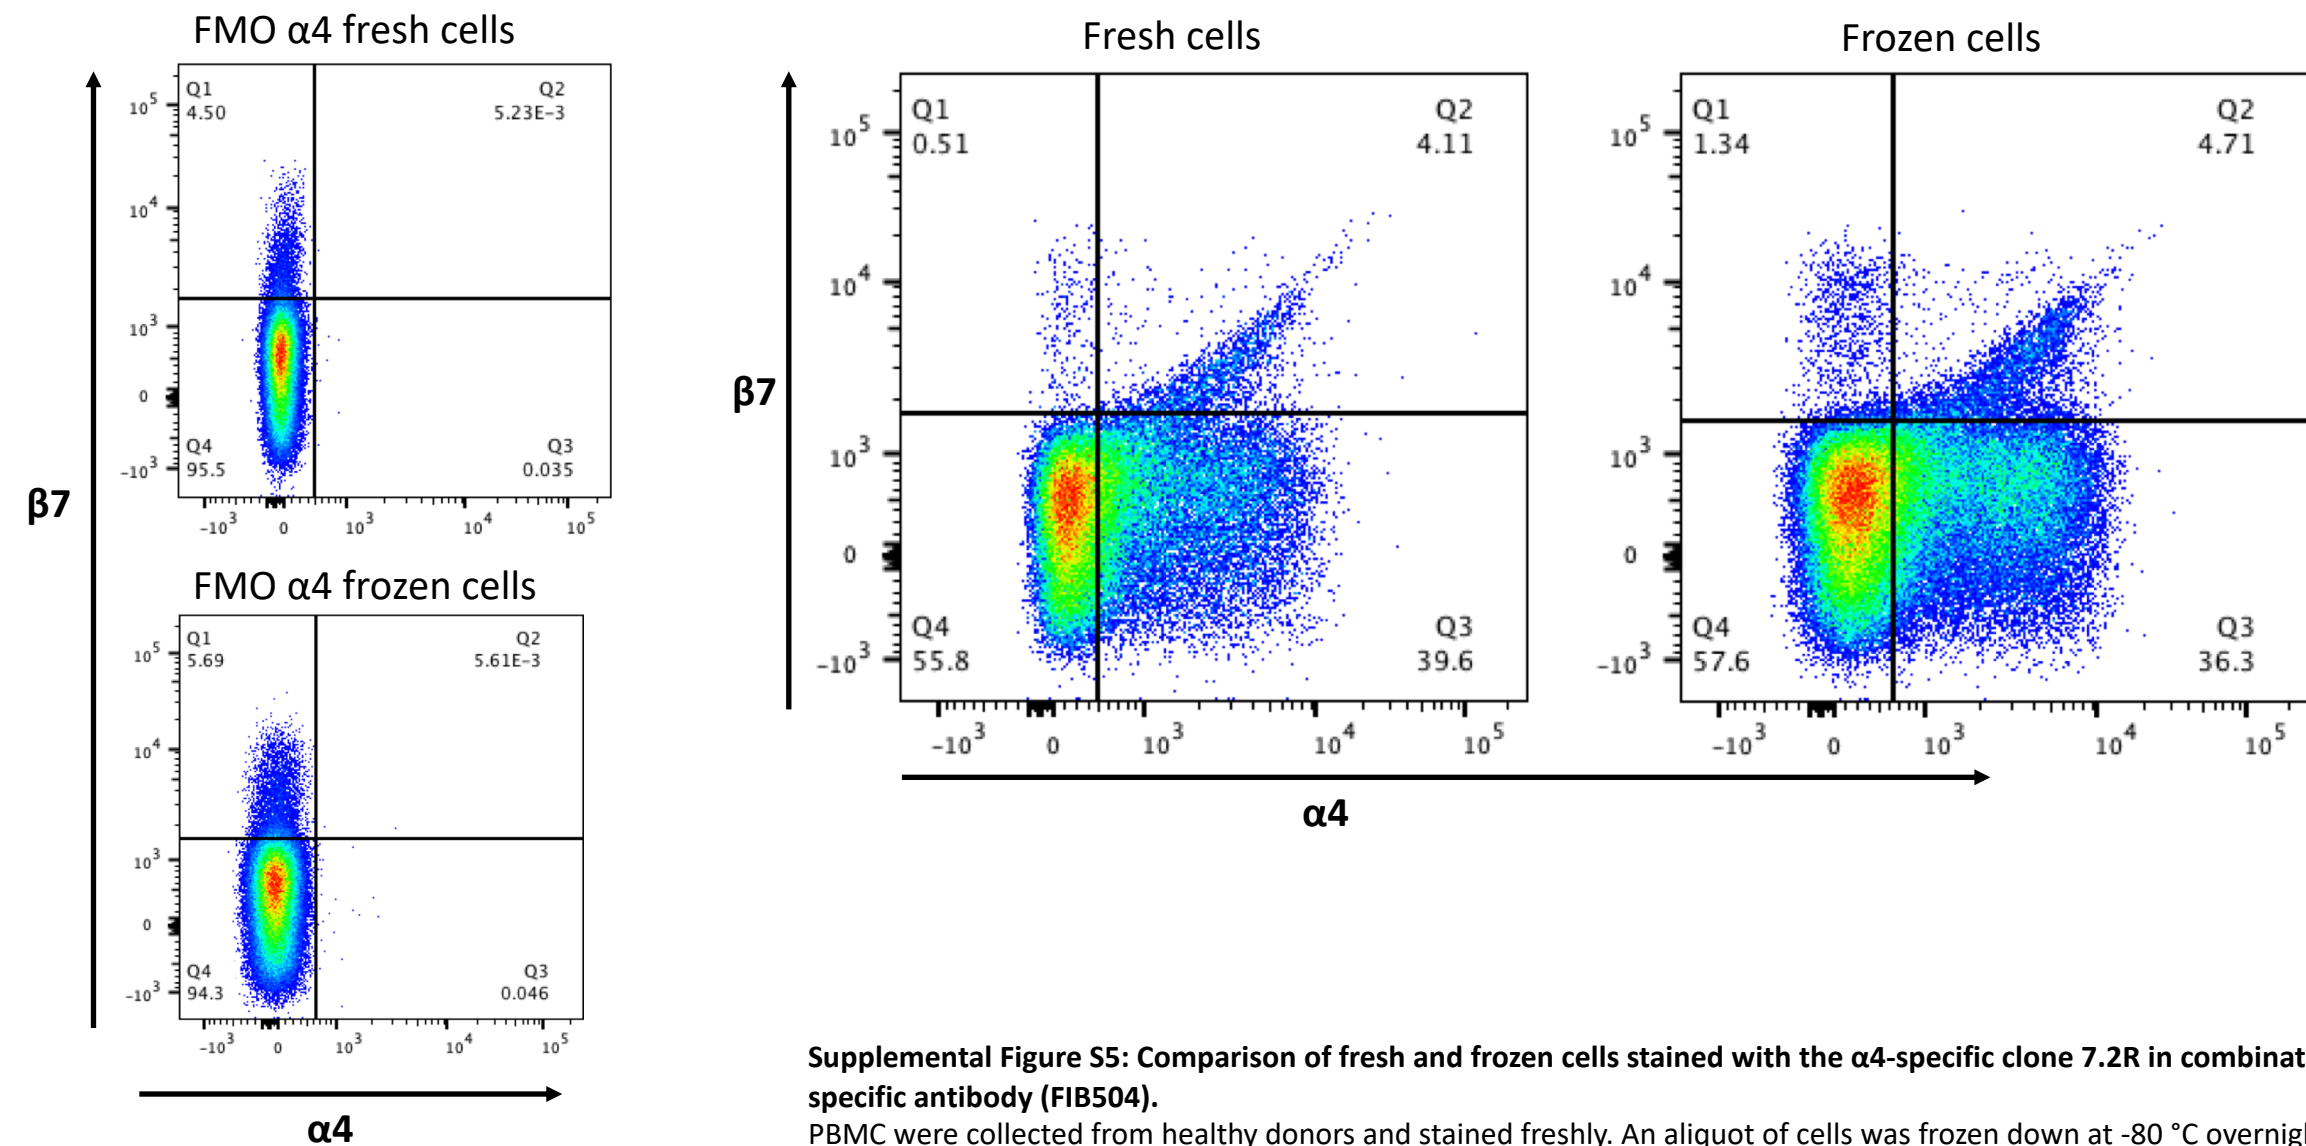

**Supplemental Figure S5: Comparison of fresh and frozen cells stained with the  $\alpha 4$ -specific clone 7.2R in combination with  $\beta 7$ -specific antibody (FIB504).**  
 PBMC were collected from healthy donors and stained freshly. An aliquot of cells was frozen down at -80 °C overnight and stained the following day. Gating according to fluorescence minus one (FMO) controls.
